# Supplementary material
Source: Springer Nature journal article supplement (https://www.springermedizin.de/resource/supplementary/12937_2013_757_MOESM4_ESM.pdf/25653992)
Supplement: MOESM4 [file 25653992]

## Tissue expression of PPAR $\alpha$ , $\beta/\delta$ , and $\gamma$

### PPAR $\alpha$

**Main tissue expression:** tissues exhibiting high carbolic rates of fatty acids (mainly liver and skeletal muscle)  
**Other tissues:** cardiomyocytes, kidney, intestinal mucosa, and brown adipose tissue

### PPAR $\beta/\delta$

**Tissue expression:** ubiquitous, however the biggest expression is in gastrointestinal tract (esophageous, liver, intestines) kidneys and skeletal muscle

### PPAR $\gamma$

**Main tissue expression:** adipose tissue (white and brown)  
**Other tissues:** intestines, liver, kidneys, retina, immunologic system (bone marrow, lymphocytes, monocytes and macrophages), trace amounts in muscles
